# Supplementary material for: Built environment and travel behavior in rural areas: A scientometric literature review
Source: Frontiers journal article supplement (doi:10.3389/fevo.2022.1018581), 2022-11-04
Supplement: Data_Sheet_1.pdf [file Data_Sheet_1.pdf]

## Appendices

### Appendix 1 Quantitative measurements of journals with built environment and travel behavior research

| Source                                                   | Number of publications | Total citations | Average citations | Ave.Norm.Citation |
|----------------------------------------------------------|------------------------|-----------------|-------------------|-------------------|
| Journal of Transport Geography                           | 12                     | 229             | 19                | 1.16              |
| Transportation                                           | 7                      | 144             | 21                | 1.36              |
| Transportation Research Record                           | 6                      | 121             | 20                | 0.60              |
| Journal of Rural Studies                                 | 4                      | 100             | 25                | 1.24              |
| Journal of Transport & Health                            | 4                      | 58              | 15                | 1.11              |
| Gender Place and Culture                                 | 2                      | 45              | 22.5              | 1.96              |
| Journal of Transport and Land Use                        | 4                      | 31              | 8                 | 0.57              |
| Sustainability                                           | 3                      | 8               | 3                 | 0.44              |
| Research in Transportation Economics                     | 1                      | 16              | 16                | 1.10              |
| Geographical Review                                      | 1                      | 1               | 1                 | 0.18              |
| Ageing & Society                                         | 1                      | 3               | 3                 | 0.96              |
| Transportation Research part D-transport and Environment | 1                      | 3               | 4                 | 0.71              |

## Appendix 2 Summaries of main keywords in travel behavior research

| Keywords                | Occurrence | Average Year<br>Published | Average Citations | Ave.Norm. Citations |
|-------------------------|------------|---------------------------|-------------------|---------------------|
| Mobility                | 20         | 2017                      | 13.20             | 0.91                |
| Impacts                 | 18         | 2018                      | 17.17             | 1.17                |
| Built environment       | 16         | 2016                      | 19.75             | 1.00                |
| Neighborhood            | 13         | 2015                      | 27.00             | 1.33                |
| Transportation          | 12         | 2017                      | 13.58             | 1.26                |
| Travel                  | 12         | 2018                      | 11.08             | 0.90                |
| Accessibility           | 11         | 2016                      | 22.27             | 1.15                |
| Travel behavior         | 11         | 2014                      | 35.82             | 1.43                |
| Walking                 | 10         | 2018                      | 12.00             | 1.22                |
| Behavior                | 9          | 2016                      | 11.44             | 0.95                |
| Transport               | 9          | 2016                      | 19.67             | 1.06                |
| Urban form              | 9          | 2017                      | 9.11              | 0.73                |
| Rural                   | 8          | 2014                      | 23.25             | 0.84                |
| Urban                   | 8          | 2017                      | 19.75             | 1.13                |
| China                   | 7          | 2018                      | 7.00              | 1.32                |
| Physical-active         | 7          | 2016                      | 11.43             | 0.83                |
| Car ownership           | 6          | 2019                      | 5.83              | 1.08                |
| Health                  | 6          | 2016                      | 10.50             | 0.63                |
| Land-use                | 6          | 2017                      | 12.33             | 0.88                |
| Mode choice             | 6          | 2016                      | 20.00             | 1.25                |
| Demand                  | 5          | 2016                      | 12.20             | 0.92                |
| Gender                  | 5          | 2018                      | 15.80             | 1.65                |
| Rural built environment | 5          | 2019                      | 5.20              | 0.99                |
| Social exclusion        | 5          | 2014                      | 27.60             | 0.96                |
| Access                  | 4          | 2018                      | 5.00              | 0.90                |
| Car                     | 4          | 2014                      | 31.25             | 1.13                |
| Migration               | 4          | 2018                      | 6.00              | 1.50                |
| Poverty                 | 4          | 2021                      | 1.00              | 0.74                |
| Travel mode choice      | 4          | 2017                      | 35.75             | 1.63                |
| Trends                  | 4          | 2018                      | 8.50              | 1.33                |
| Children                | 3          | 2016                      | 23.00             | 2.21                |
| Choice                  | 3          | 2014                      | 10.67             | 0.72                |
| Infrastructure          | 3          | 2020                      | 0.67              | 0.73                |
| Life                    | 3          | 2017                      | 5.33              | 0.46                |
| Ownership               | 3          | 2020                      | 2.33              | 0.43                |
| Policy                  | 3          | 2014                      | 28.67             | 1.37                |
| Public-health           | 3          | 2015                      | 13.67             | 0.84                |
| Self-selection          | 3          | 2015                      | 49.67             | 1.60                |
| Time                    | 3          | 2016                      | 10.33             | 0.99                |
| Vehicle ownership       | 3          | 2019                      | 9.33              | 1.63                |



### Appendix 3 Quantitative measurements of scholars in travel behavior research

| Scholar                 | Documents | Citations | Norm.<br>citations | Avg. pub.<br>year | Avg.<br>citations | Avg. norm.<br>citations |
|-------------------------|-----------|-----------|--------------------|-------------------|-------------------|-------------------------|
| Ao, Yibin               | 5         | 26        | 4.96               | 2019              | 5.20              | 0.99                    |
| Chen, Chuan             | 3         | 22        | 3.82               | 2018              | 7.33              | 1.27                    |
| Chen, Yunfeng           | 2         | 4         | 1.14               | 2019              | 2.00              | 0.57                    |
| Derudder, Ben           | 2         | 147       | 3.72               | 2012              | 73.50             | 1.86                    |
| Hine, Julian            | 2         | 32        | 1.08               | 2012              | 16.00             | 0.54                    |
| Van Acker,<br>Veronique | 2         | 147       | 3.72               | 2012              | 73.50             | 1.86                    |
| Wang, Yan               | 5         | 26        | 4.96               | 2019              | 5.20              | 0.99                    |
| Witlox, Frank           | 2         | 147       | 3.72               | 2012              | 73.50             | 1.86                    |
| Yang, Dujuan            | 3         | 22        | 3.82               | 2018              | 7.33              | 1.27                    |
| Zhang, Yuting           | 2         | 4         | 1.14               | 2019              | 2.00              | 0.57                    |
| Zhao, Pengjun           | 2         | 11        | 3.77               | 2020              | 5.50              | 1.89                    |

Appendix 4. Table of countries actively engaged in travel behavior

| Country       | Number of publications | Total link strength | Average publication year | Number of citations | Average citation | Ave.Norm.Citation |
|---------------|------------------------|---------------------|--------------------------|---------------------|------------------|-------------------|
| USA           | 20                     | 6                   | 2015                     | 325                 | 16               | 0.83              |
| China         | 10                     | 7                   | 2019                     | 64                  | 6                | 1.34              |
| Netherlands   | 8                      | 6                   | 2018                     | 33                  | 4                | 0.72              |
| England       | 6                      | 3                   | 2015                     | 207                 | 35               | 1.38              |
| Canada        | 5                      | 1                   | 2015                     | 67                  | 13               | 1.01              |
| Australia     | 3                      | 3                   | 2013                     | 81                  | 27               | 1.38              |
| India         | 2                      | 1                   | 2012                     | 26                  | 13               | 0.61              |
| North Ireland | 2                      | 2                   | 2013                     | 32                  | 16               | 0.54              |
| Singapore     | 2                      | 1                   | 2016                     | 17                  | 9                | 0.48              |
| Scotland      | 2                      | 3                   | 2019                     | 1                   | 1                | 0.09              |
| Ecuador       | 1                      | 1                   | 2018                     | 6                   | 6                | 0.98              |
| Ethiopia      | 1                      | 1                   | 2020                     | 1                   | 1                | 0.32              |
| Iran          | 1                      | 1                   | 2014                     | 2                   | 2                | 0.13              |
| Kenya         | 1                      | 2                   | 2020                     | 0                   | 0                | 0.00              |

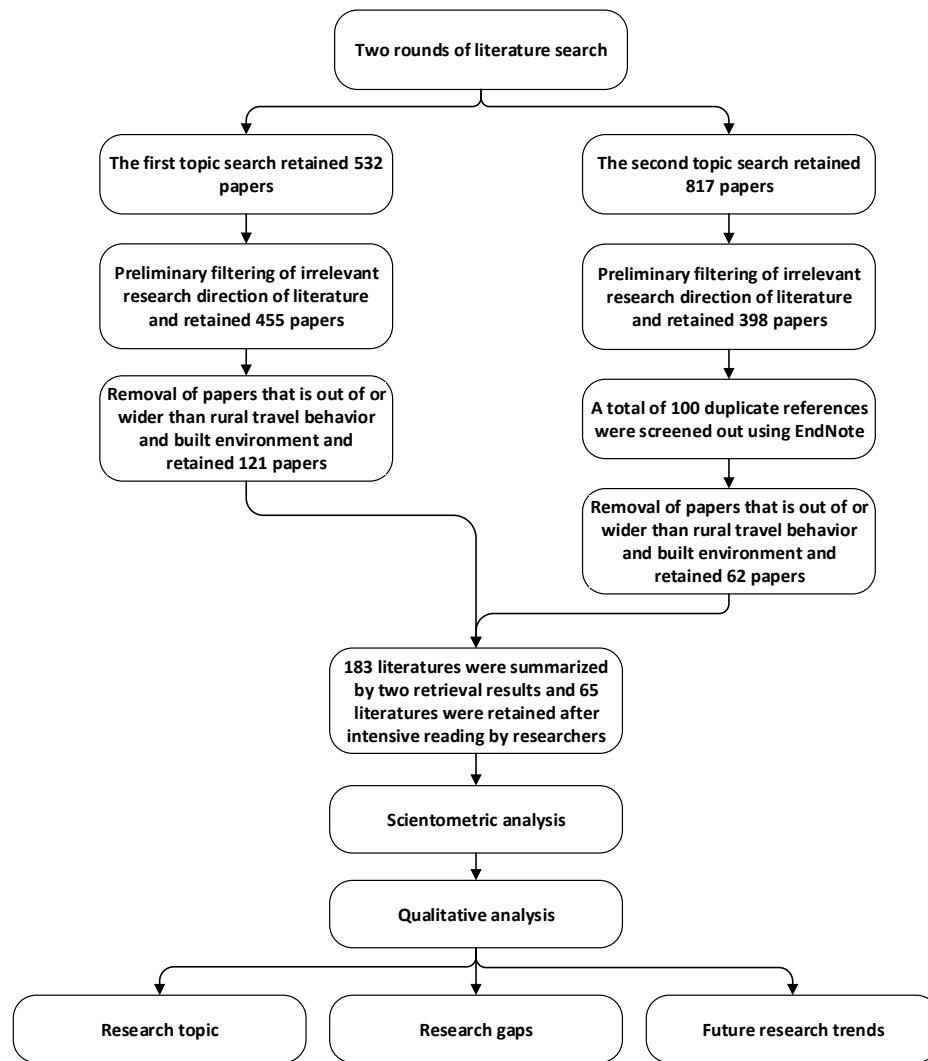

Fig. 1. Flow chart of scientific analysis of literature on this research topic

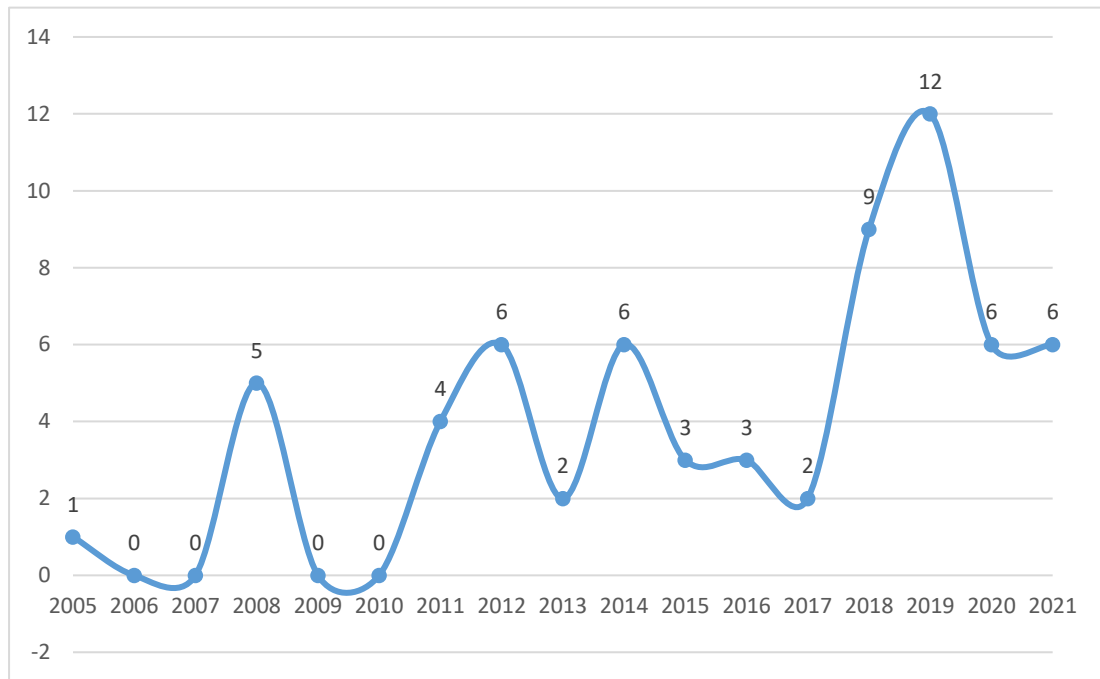

Fig. 2. Annual publications from 2005 to 2021 in the research field

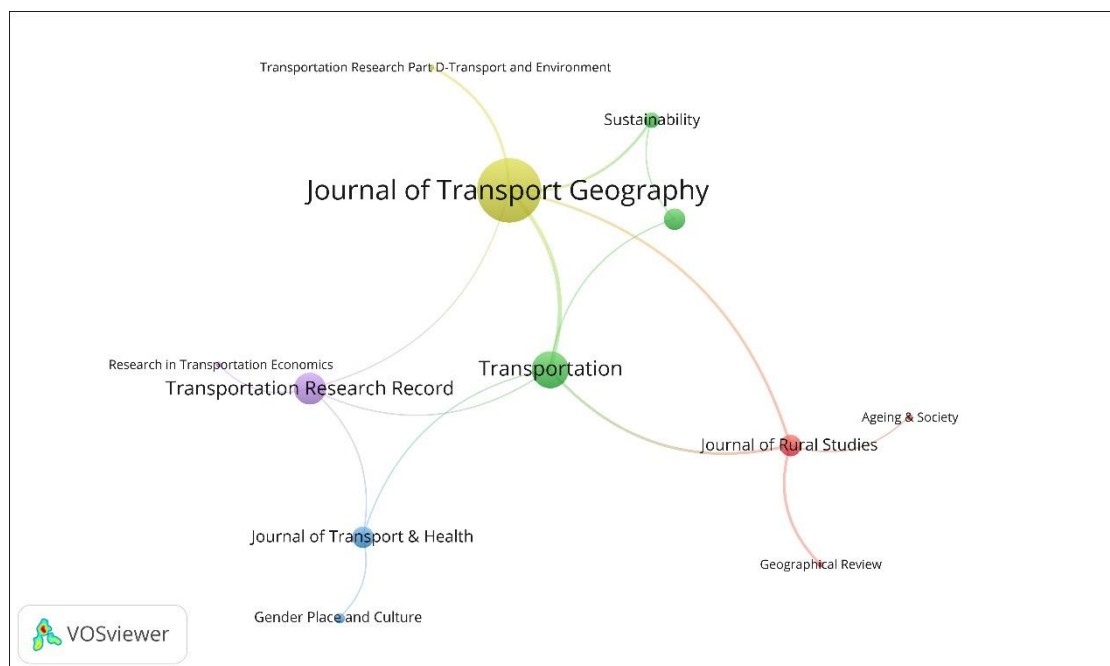

Fig. 3. Map of mainstream journals in the field of rural travel behavior

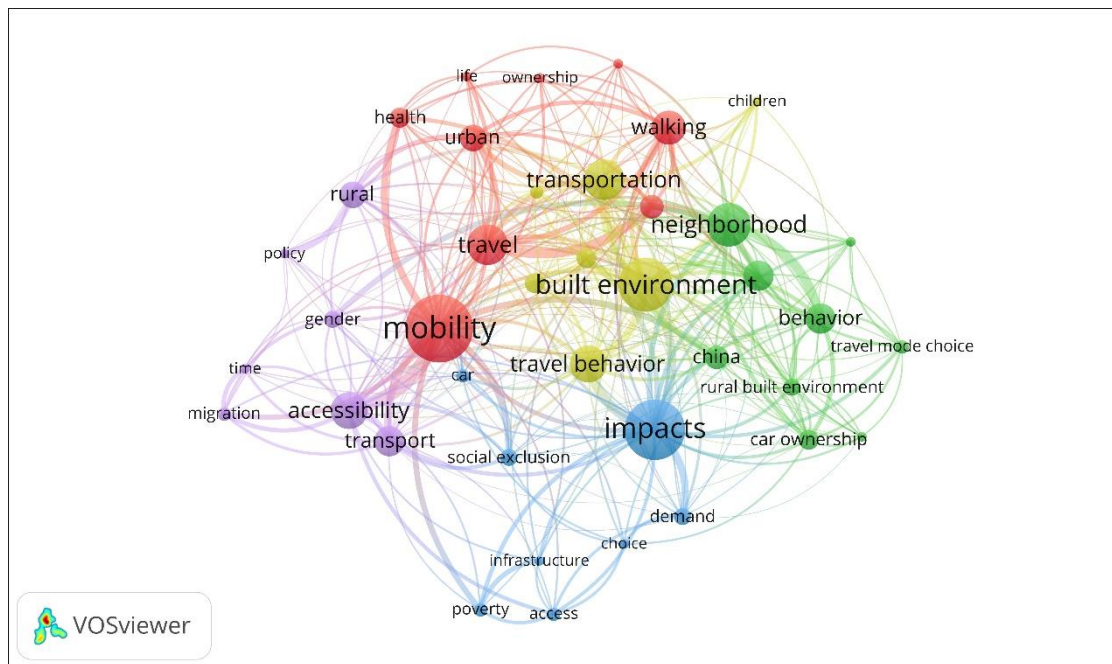

Fig. 4. Map of co-occurrence of keywords

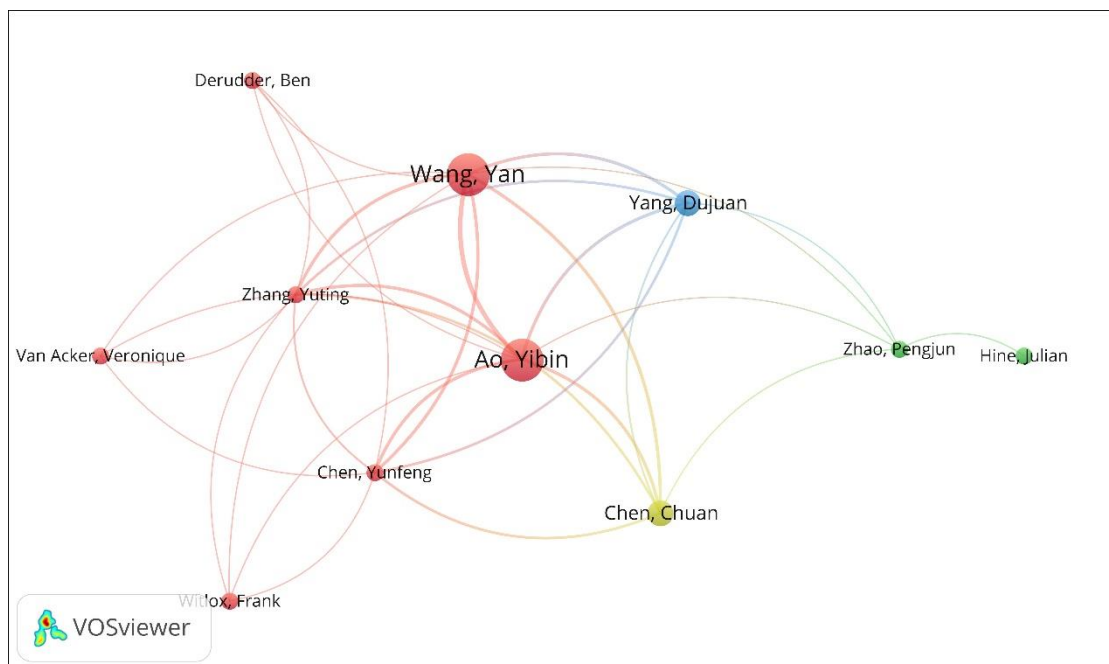

Fig. 5. Map of co-authorship in the field of rural travel behavior



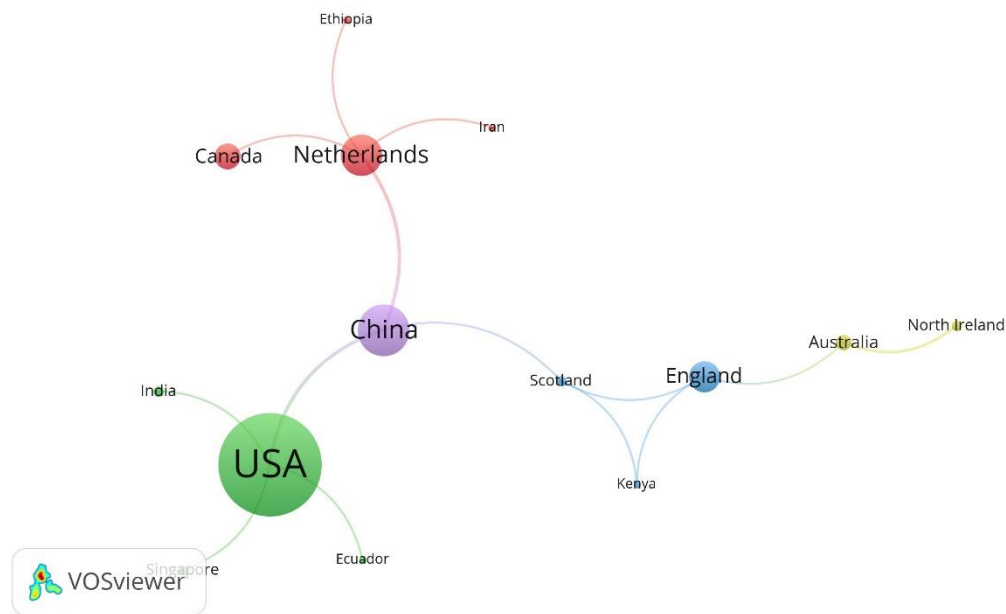

Fig. 6. Map of countries actively engaged in this research topic

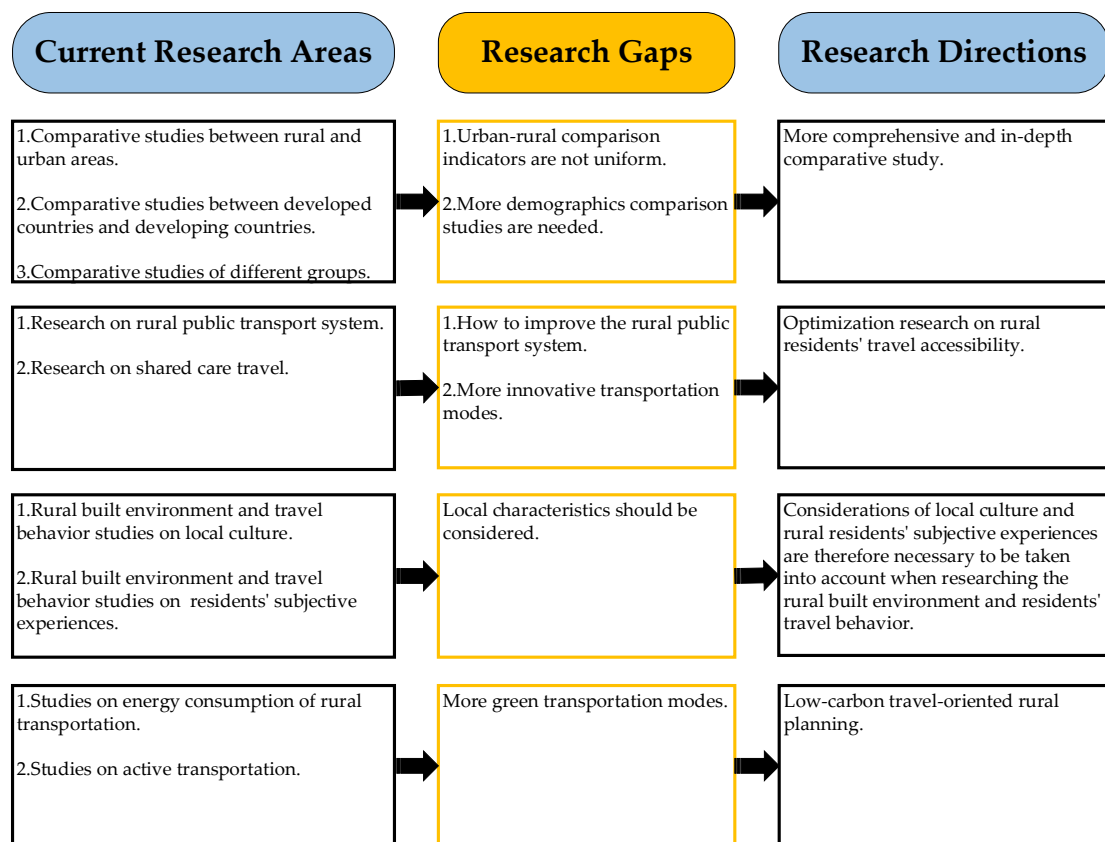

Fig. 7. Framework linking current research topics to future research directions

**Figure list:**

- Fig. 1. Flow chart of scientific analysis of literature on this research topic
- Fig. 2. Annual publications from 2005 to 2021 in the research field
- Fig. 3. Map of mainstream journals in the field of rural travel behavior
- Fig. 4. Map of co-occurrence of keywords
- Fig. 5. Map of co-authorship in the field of rural travel behavior
- Fig. 6. Map of countries actively engaged in this research topic
- Fig. 7. Framework linking current research topics to future research directions
